# Supplementary material for: Colon cancer combined with obesity indicates improved survival- research on relevant mechanism
Source: publisher site journal article supplement (doi:10.18632/aging.103972), 2020-11-10
Supplement: Supplementary file [file aging-v12i23-103972-supplementary-material-SD2.pdf]

SUPPLEMENTARY FIGURE

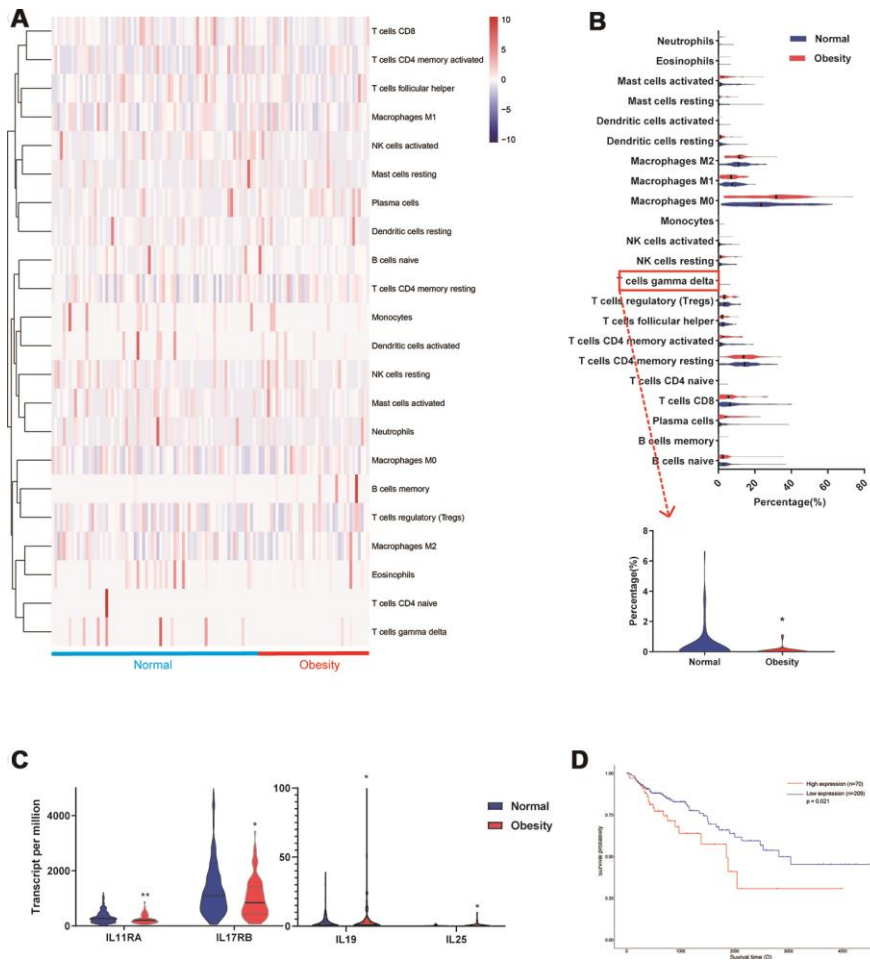

**Supplementary Figure 1. Obesity alters tumor infiltrating immune cells and expression of interleukins.** (A) Heatmap of 22 types immune cells analyzed by CIBERSORT algorithm. (B) The proportions of immune cells in normal and obesity groups. (C) The mRNA expression of interleukins families in normal and obesity groups. (D) The relationship of OS and IL11RA (divided by median of expression) performed by Kaplan-Meier analysis. (\* $p < 0.05$ , \*\* $p < 0.01$ ).
